# Supplementary material for: Broadband emission in alkali halides triggered by Sb3+ doping
Source: Royal Society of Chemistry journal article supplement (doi:10.1039/d4cc04021j), 2024-01-01
Supplement: d4cc04021j1.pdf [file d4cc04021j1.pdf]

Electronic Supporting Information (ESI)

**Broadband Emission in Alkali Halides Triggered by Sb<sup>3+</sup> Doping**

Yanyan Li,<sup>a,b</sup> Mircea Cotlet,<sup>c</sup> Ido Hadar,<sup>d</sup> and Peijun Guo<sup>a,b,\*</sup>

- a. Department of Chemical and Environmental Engineering, Yale University, 9 Hillhouse Avenue, New Haven, CT 06520, United States
- b. Energy Sciences Institute, Yale University, 810 West Campus Drive, West Haven, CT 06516, United States
- c. Center for Functional Nanomaterials, Brookhaven National Laboratory, Upton, NY, USA.
- d. Institute of Chemistry, and the Center for Nanoscience and Nanotechnology, The Hebrew University of Jerusalem, Jerusalem, 91904, Israel

Email: [peijun.guo@yale.edu](mailto:peijun.guo@yale.edu)

## Experimental Section

**Materials.** Sodium chloride (NaCl, >99.5%, TCI), potassium chloride (KCl, ACS reagent, 99.0-100.5%, Sigma-Aldrich), rubidium chloride (RbCl, 99.8% trace metals basis, Sigma-Aldrich), Antimony(III) chloride (SbCl<sub>3</sub>, ≥99.95% trace metals basis, Sigma-Aldrich), formic acid (88%, Sigma-Aldrich), dimethyl sulfoxide (99.9%, SuperDry, J&K Scientific), and toluene (anhydrous, 99.8%, Sigma-Aldrich) were all procured from commercial vendors and used without further purification.

**Synthesis of Sb<sup>3+</sup>-doped NaCl, KCl, and RbCl single crystals.** Sb<sup>3+</sup>-doped NaCl single crystals were synthesized using a slow evaporation technique. Typically, 0.6 mmol NaCl and 0.18 mmol SbCl<sub>3</sub> were dissolved in a mixture of formic acid and dimethyl sulfoxide, and the solution was stirred at 100 °C until it became clear. Then, the solution was filtered with a 0.22 μm polytetrafluoroethylene (PTFE) syringe, and the filtered solution was injected into vials and sealed with a paraffin film with small holes. The solution was then filtered using a 0.22 μm polytetrafluoroethylene (PTFE) filter. The filtered solution was injected into vials, sealed with paraffin film with small holes, and placed in a sealed container with dimethyl sulfoxide. Single crystals were obtained by maintaining the solution at 100 °C for 48 hours. The preparation of Sb<sup>3+</sup>-doped KCl and RbCl single crystals followed the same procedures, with KCl and RbCl substituting NaCl. To synthesize different dopant ratios of 10%, 20%, and 40% Sb<sup>3+</sup>-doped NaCl crystals, 0.06, 0.12, and 0.24 mmol SbCl<sub>3</sub> were added to the precursor solution, respectively, while keeping the other conditions constant.

**Characterization.** Powder X-ray diffraction (PXRD) data of Sb<sup>3+</sup>-doped ACl (A = Na, K, and Rb) single crystals were obtained by using a Rigaku SmartLab X-ray diffractometer with Cu Kα radiation (λ = 1.5418 Å). The scanning electron microscopy (SEM) images and the energy dispersive spectroscopy (EDS) elemental mapping of samples were obtained by using a scanning electron microscope (Hitachi SU8230). Photoluminescence (PL) and time-resolved PL (TRPL) measurements were conducted by excitation wavelength of 320 nm using a fs Yb:KGW laser (Pharos, Light Conversion). PL spectra was captured by a Si EMCCD (Andor iXon Life 888), and time-resolved PL was collected by a streak camera (Hamamatsu C10910 with the Slow sweep unit; M10913). For the temperature-dependent PL and TRPL measurements, samples were mounted in a helium cryostat (DE-204SF, Advanced Research Systems) under vacuum. PL excitation (PLE) measurements of samples were performed by using Horiba Nanolog Fluorescence Spectrometer for UV-VIS-NIR (400-1750nm). The photoluminescence quantum yield (PLQY) of our samples was measured using an Edinburgh FLS1000 fluorimeter with an integrating sphere.

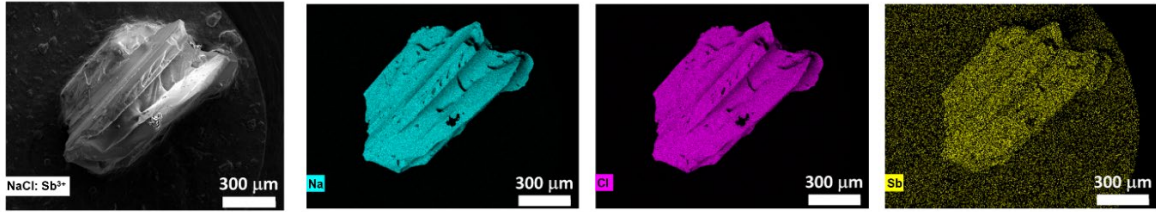

**Figure S1.** SEM image and EDS elemental mappings of NaCl:Sb<sup>3+</sup> single crystal.

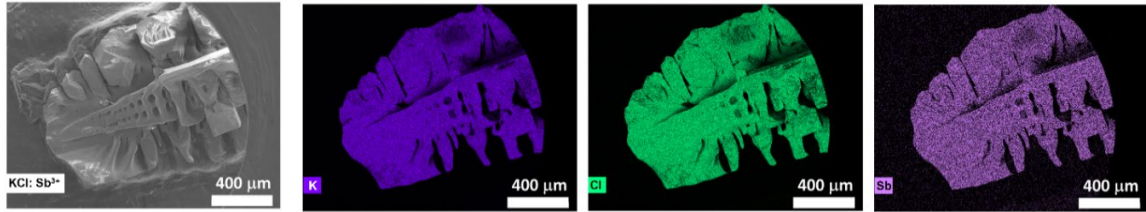

**Figure S2.** SEM image and EDS elemental mappings of KCl:Sb<sup>3+</sup> single crystal.

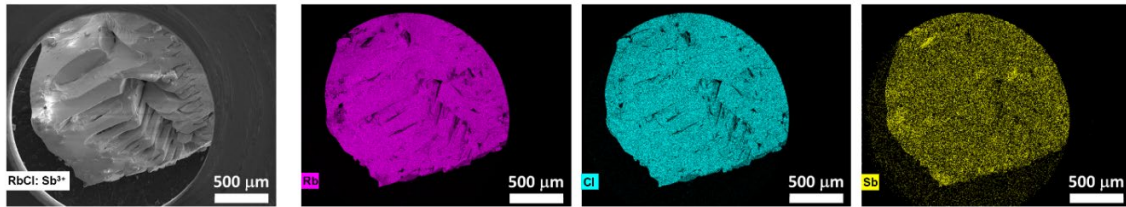

**Figure S3.** SEM image and EDS elemental mappings of RbCl:Sb<sup>3+</sup> single crystal.

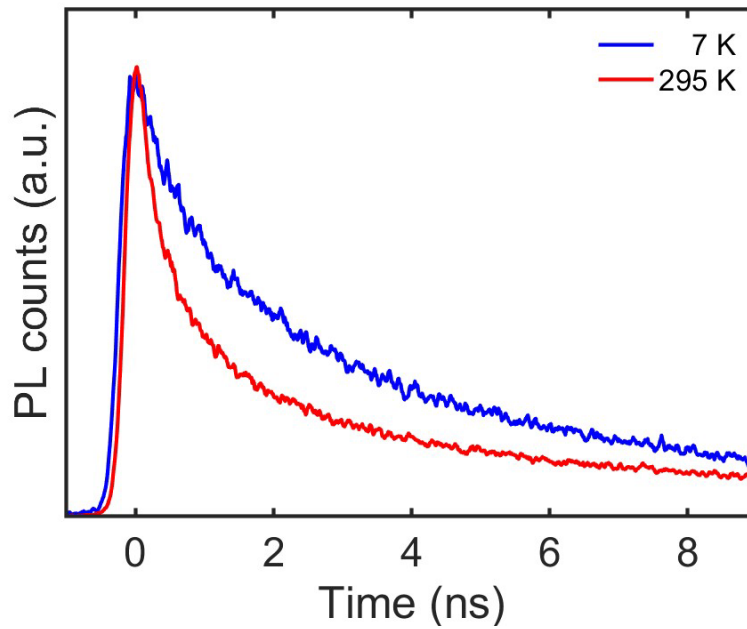

**Figure S4.** TRPL spectra of NaCl:Sb<sup>3+</sup> measured on a 10 ns time scale at 295K and 7K.

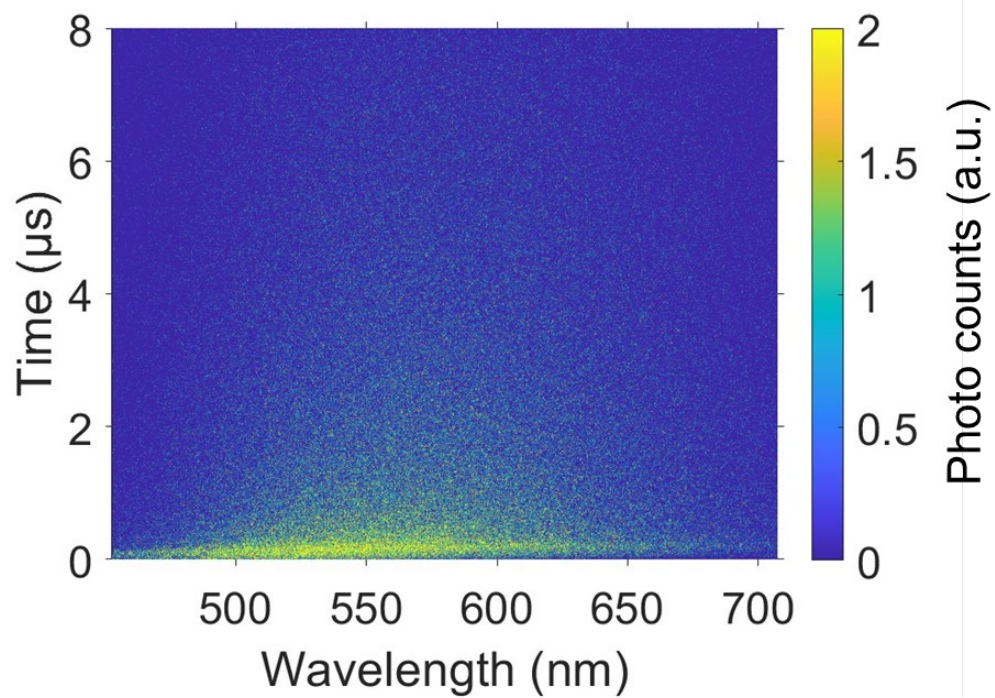

**Figure S5.** TRPL 2D mapping of KCl:Sb<sup>3+</sup> measured at room temperature.

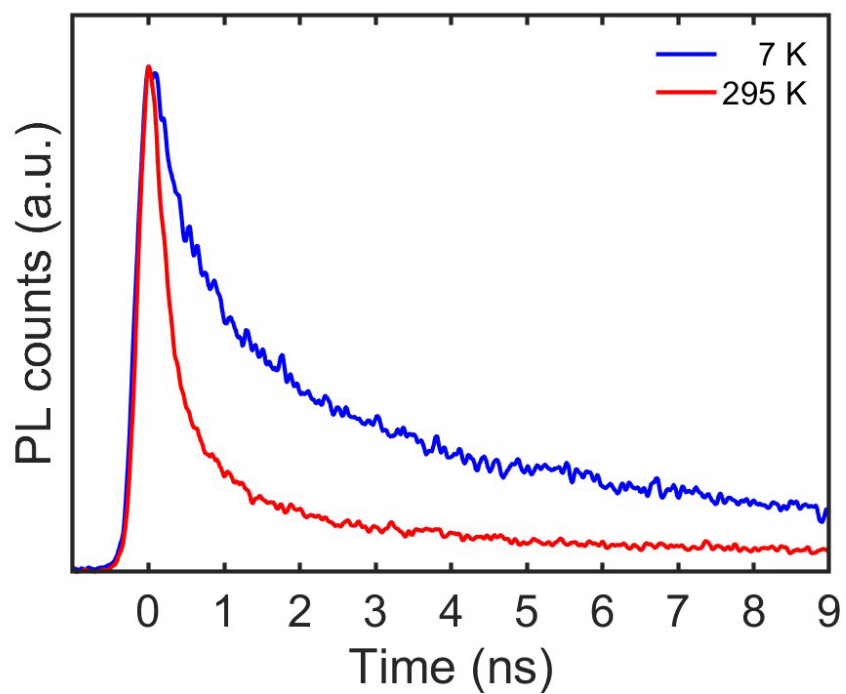

**Figure S6.** TRPL spectra of KCl:Sb<sup>3+</sup> measured on a 10 ns time scale at 295K and 7K.

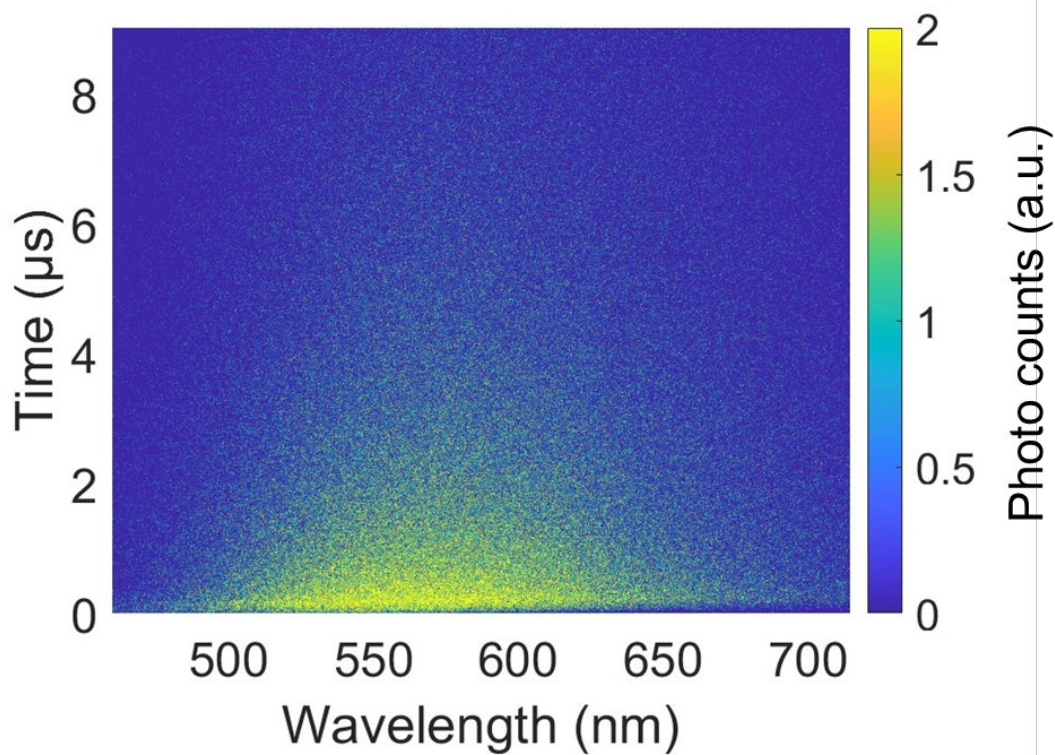

**Figure S7.** TRPL 2D mapping of RbCl:Sb<sup>3+</sup> measured at room temperature.

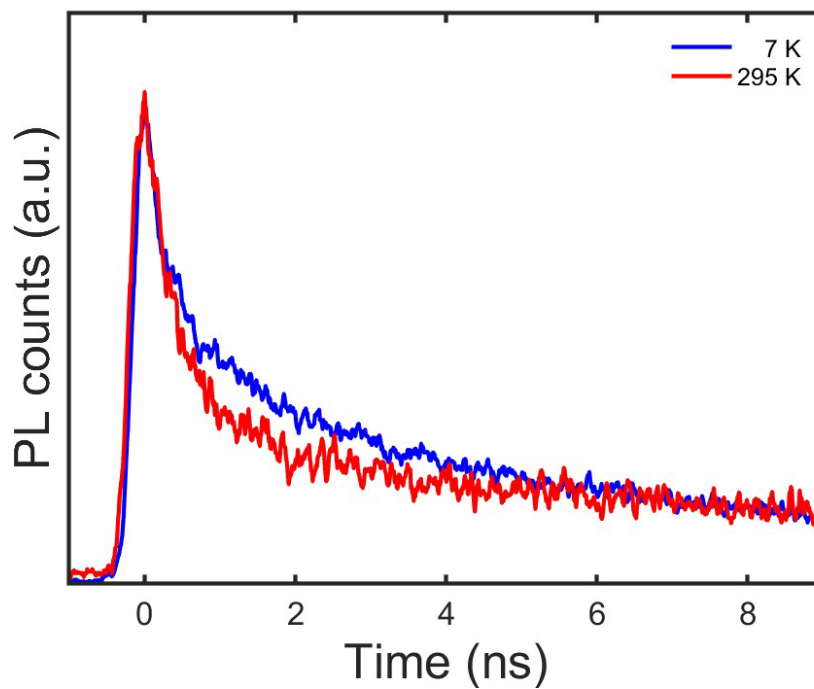

**Figure S8.** TRPL spectra of RbCl:Sb<sup>3+</sup> measured on a 10 ns time scale at 295K and 7K.

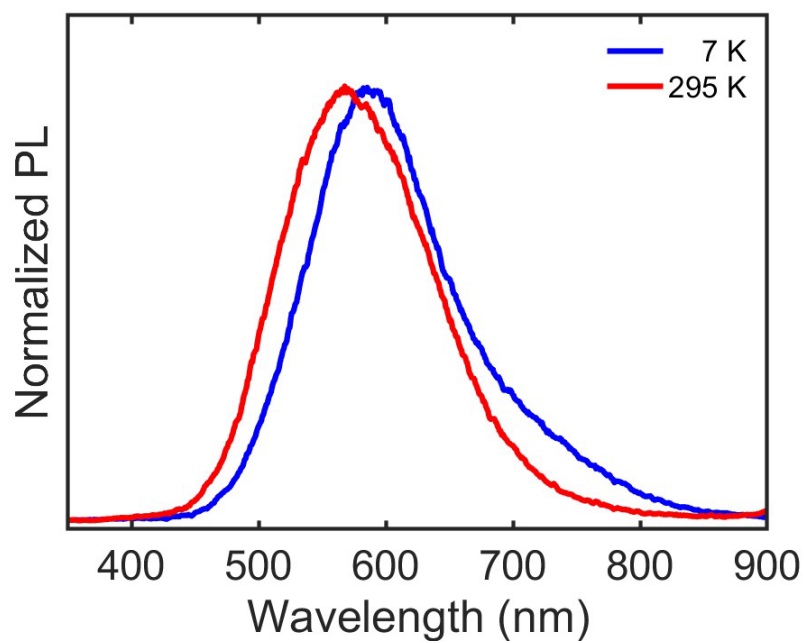

**Figure S9.** Comparison of PL spectra of KCl:Sb<sup>3+</sup> measured at 295K and 7K.

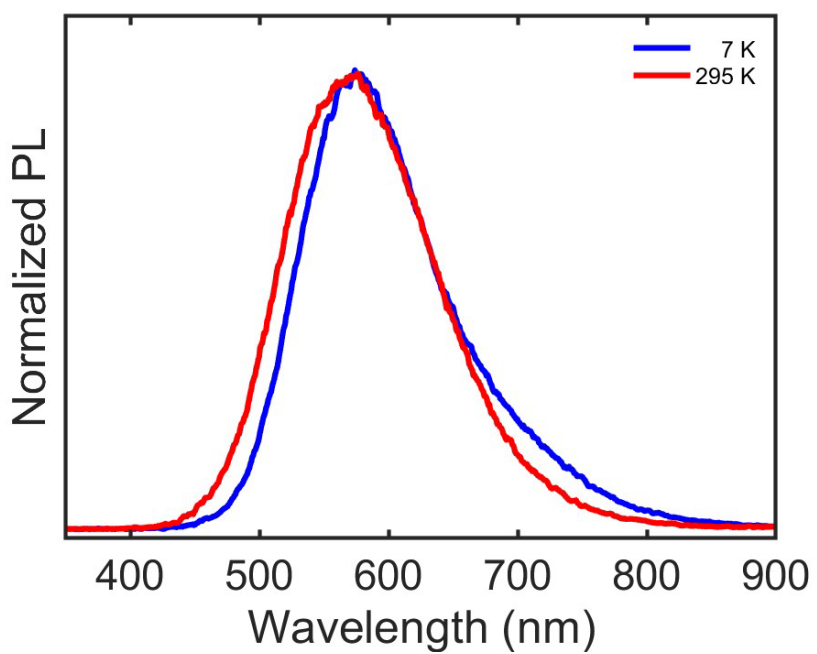

**Figure S10.** Comparison of PL spectra of RbCl:Sb<sup>3+</sup> measured at 295K and 7K.

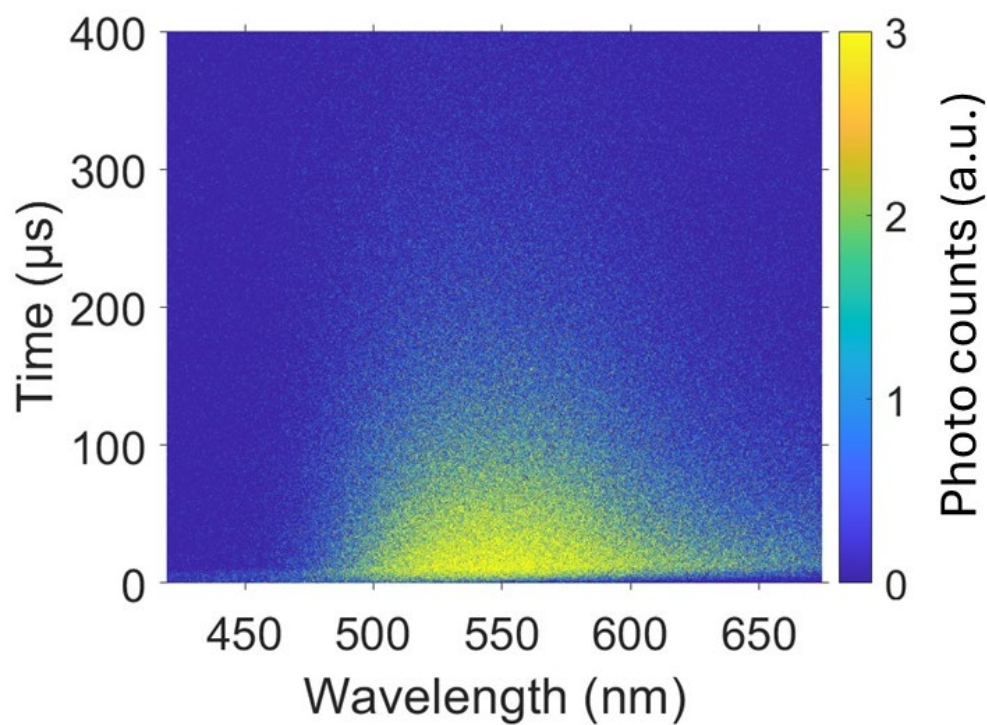

**Figure S11.** TRPL 2D mapping of NaCl:Sb<sup>3+</sup> measured at 7K.

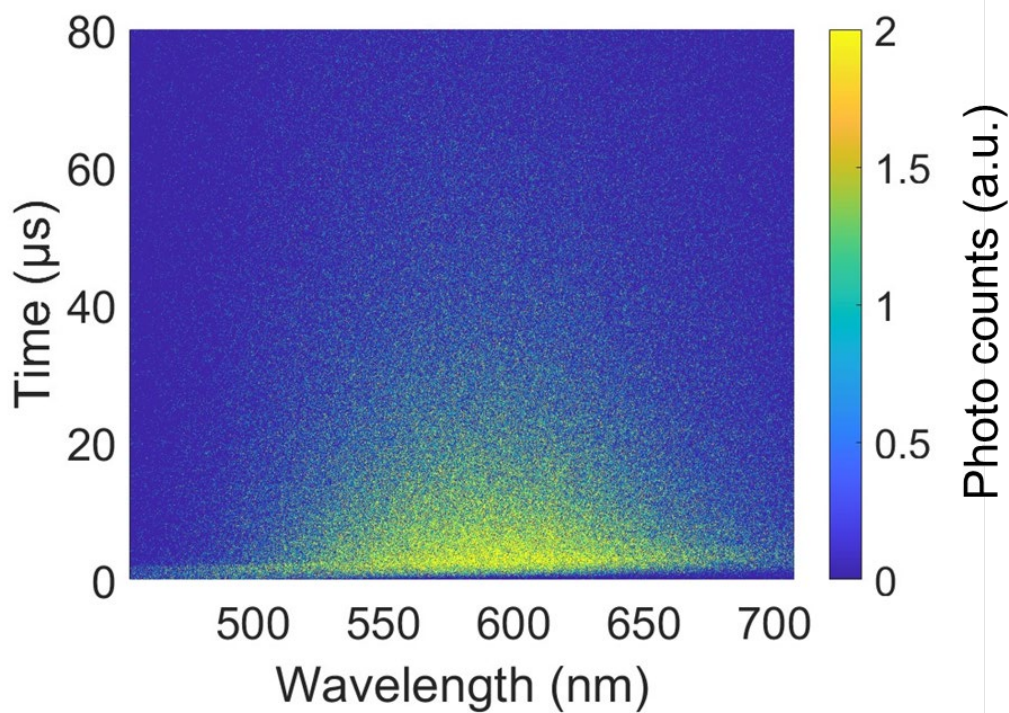

**Figure S12.** TRPL 2D mapping of KCl:Sb<sup>3+</sup> measured at 7K.

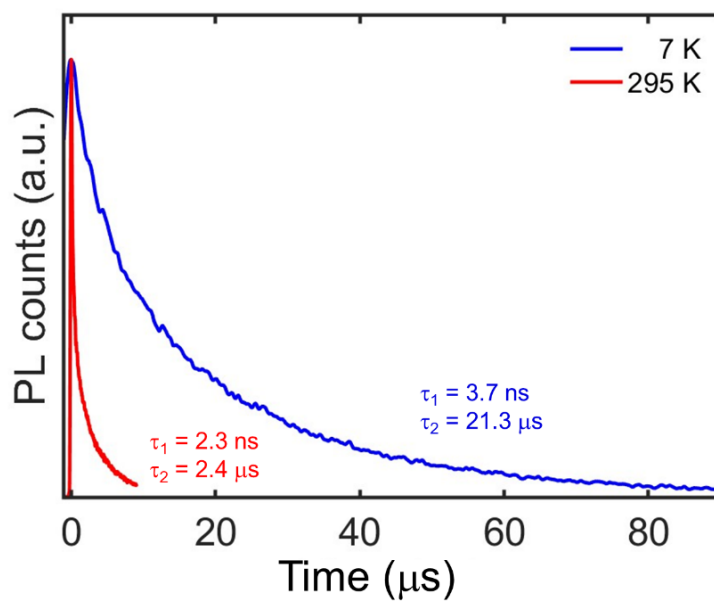

**Figure S13.** Comparison of TRPL spectra of KCl:Sb<sup>3+</sup> measured on a 10 μs time scale at 295K and 7K.

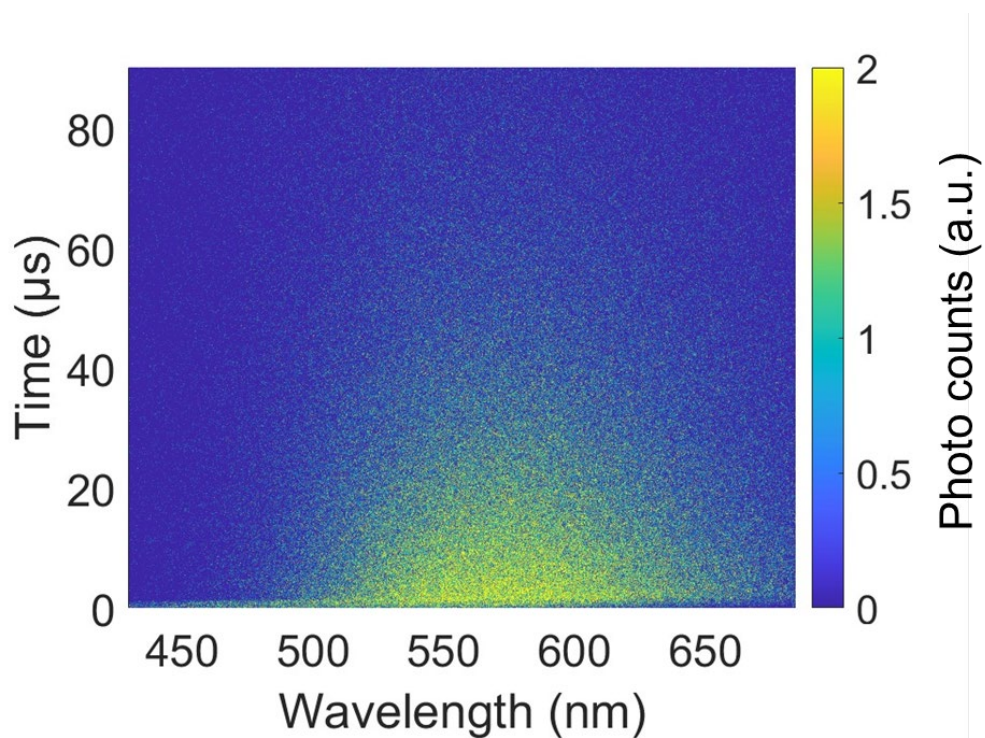

**Figure S14.** TRPL 2D mapping of RbCl:Sb<sup>3+</sup> measured at 7K.



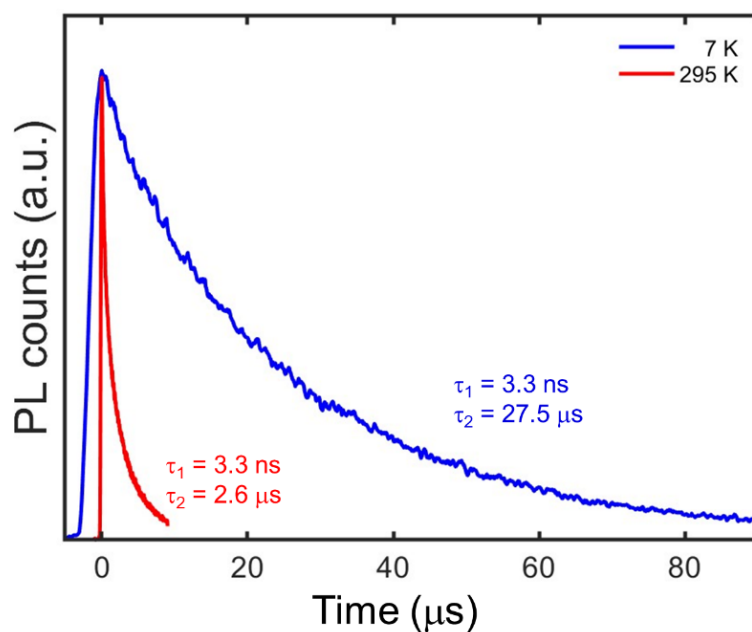

**Figure S15.** Comparison of TRPL spectra of  $\text{RbCl:Sb}^{3+}$  measured on a  $10 \text{ }\mu\text{s}$  time scale at 295K and 7K.

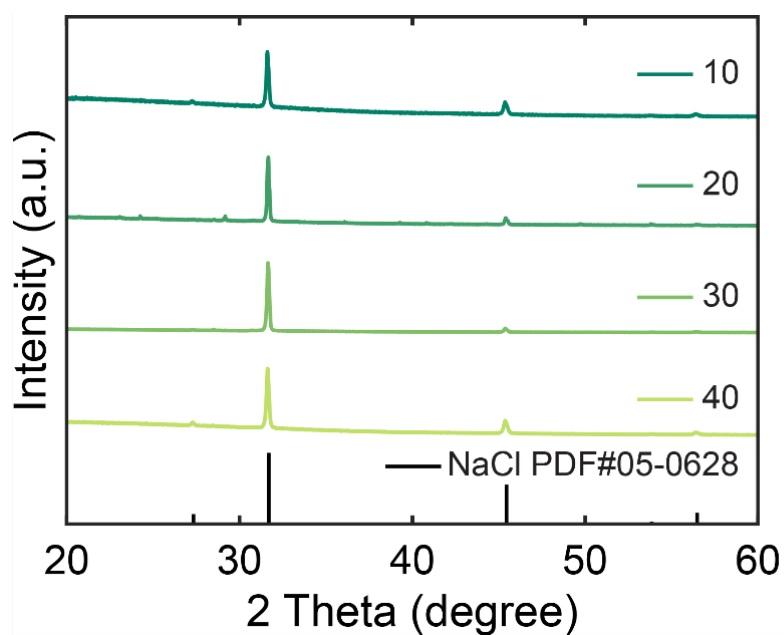

**Figure S16.** Comparison of PXRD patterns of  $\text{NaCl:Sb}^{3+}$  doped with different contents of  $\text{Sb}^{3+}$ .

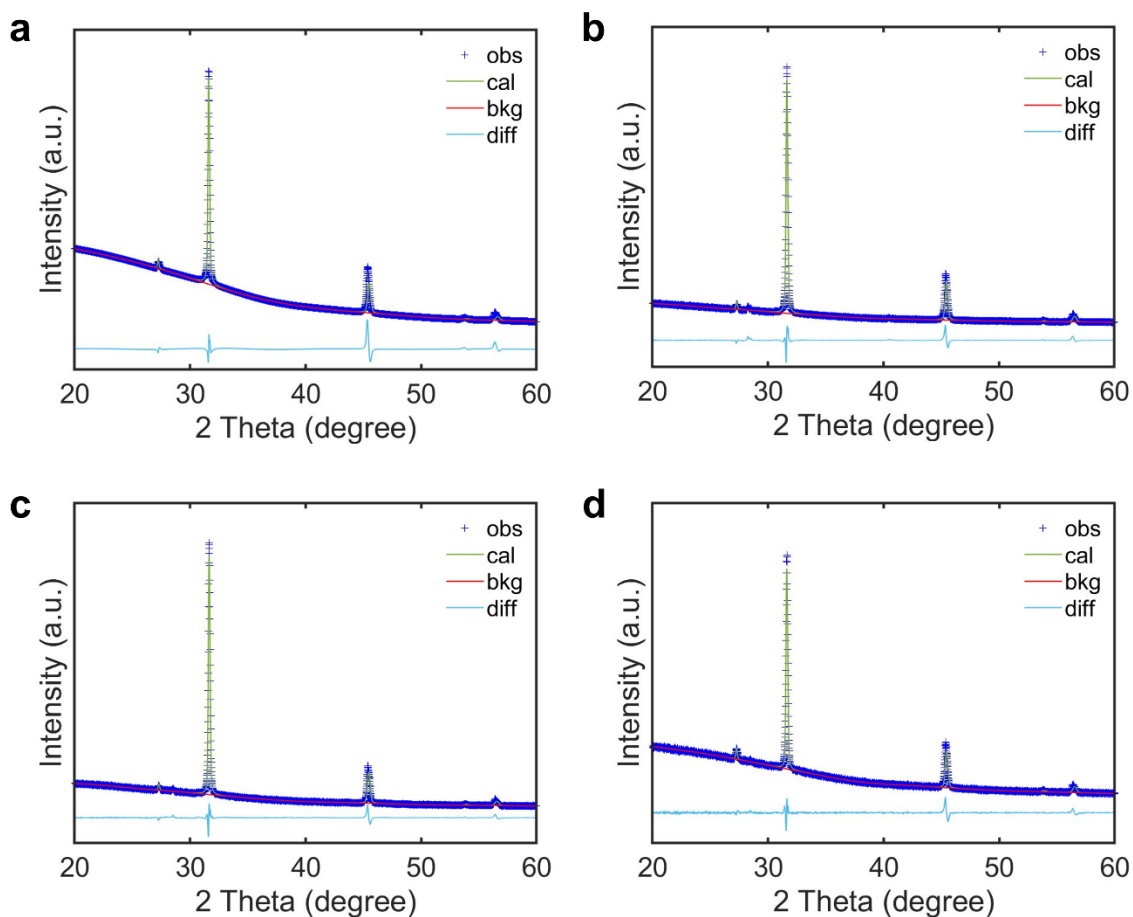

**Figure S17.** Powder XRD pattern (blue “+”) of (a) 10% Sb<sup>3+</sup>-doped NaCl, (b) 20% Sb<sup>3+</sup>-doped NaCl, (c) 30% Sb<sup>3+</sup>-doped NaCl, and (d) 40% Sb<sup>3+</sup>-doped NaCl single crystal with Rietveld refinement fits (green lines) using GSAS-II and their difference map (cyan lines).

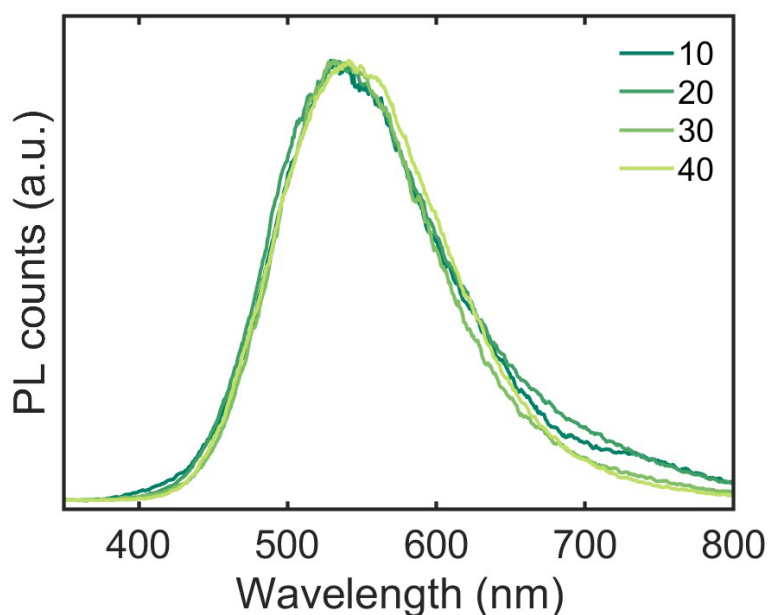

**Figure S18.** Comparison of PL spectra of NaCl:Sb<sup>3+</sup> doped with different contents of Sb<sup>3+</sup>.

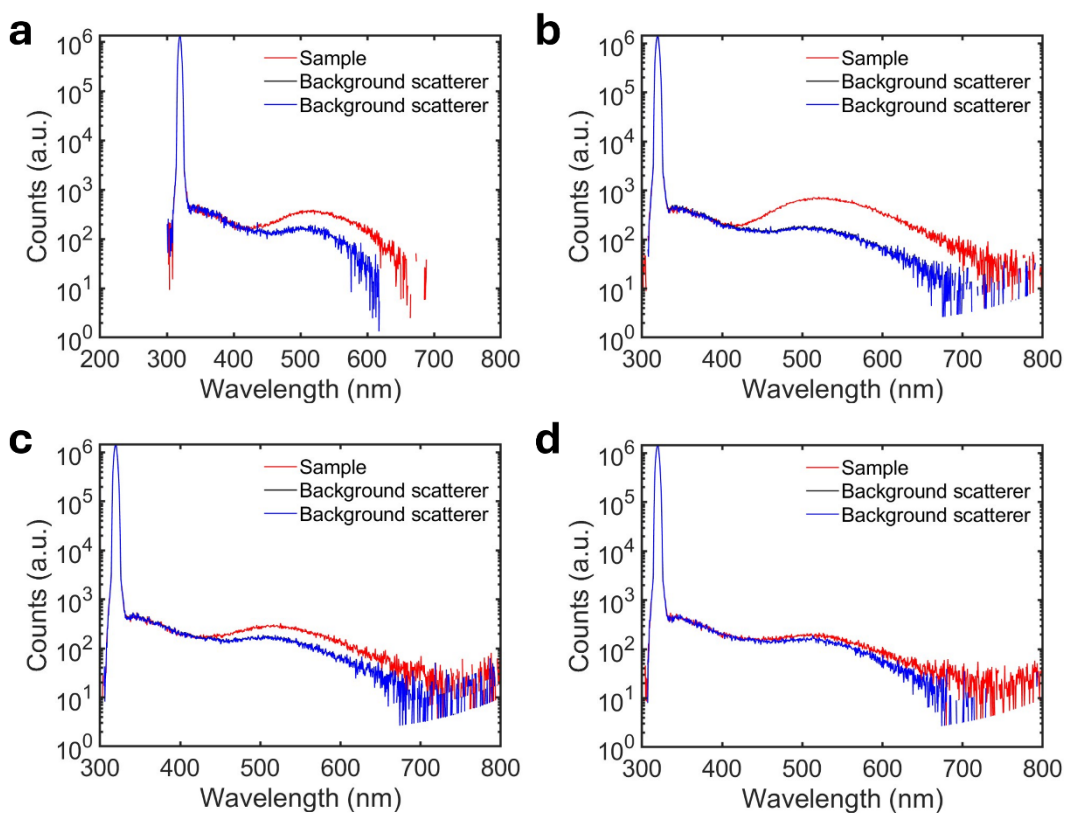

**Figure S19.** Photoluminescence quantum yield (PLQY) measurement of a) NaCl: 10% Sb<sup>3+</sup>, b) NaCl: 20% Sb<sup>3+</sup>, c) NaCl: 30% Sb<sup>3+</sup>, and d) NaCl: 40% Sb<sup>3+</sup>.

| <b>Samples</b>              | <b>Unit cell <math>a</math> (Å)</b> | <b>Unit cell volume (Å<sup>3</sup>)</b> |
|-----------------------------|-------------------------------------|-----------------------------------------|
| 10% Sb <sup>3+</sup> : NaCl | 5.59821                             | 175.448                                 |
| 20% Sb <sup>3+</sup> : NaCl | 5.61914                             | 177.423                                 |
| 30% Sb <sup>3+</sup> : NaCl | 5.61839                             | 177.352                                 |
| 40% Sb <sup>3+</sup> : NaCl | 5.61794                             | 177.309                                 |

Table S1. Unit cell parameters of refinement of the Sb<sup>3+</sup>: NaCl with different Sb<sup>3+</sup> concentrations.

| <b>Samples</b>              | <b>Atomic ratio of Sb (%)</b> |
|-----------------------------|-------------------------------|
| 20% Sb <sup>3+</sup> : NaCl | 0.29                          |
| 30% Sb <sup>3+</sup> : NaCl | 0.43                          |
| 40% Sb <sup>3+</sup> : NaCl | 1.24                          |
| 30% Sb <sup>3+</sup> : KCl  | 0.54                          |
| 30% Sb <sup>3+</sup> : RbCl | 0.74                          |

Table S2. EDS results of Sb<sup>3+</sup>-doped ACl (A = Na, K, and Rb) single crystals.
